# Supplementary material for: MEK/CDK4,6 co-targeting is effective in a subset of NRAS, BRAF and ‘wild type’ melanomas
Source: PubMed Central journal article supplement (PMC6201855; doi:10.18632/oncotarget.26204), 2018-10-09
Supplement: oncotarget-09-34990-s001.pdf [file oncotarget-09-34990-s001.pdf]

## MEK/CDK4,6 co-targeting is effective in a subset of NRAS, BRAF and 'wild type' melanomas

### SUPPLEMENTARY MATERIALS

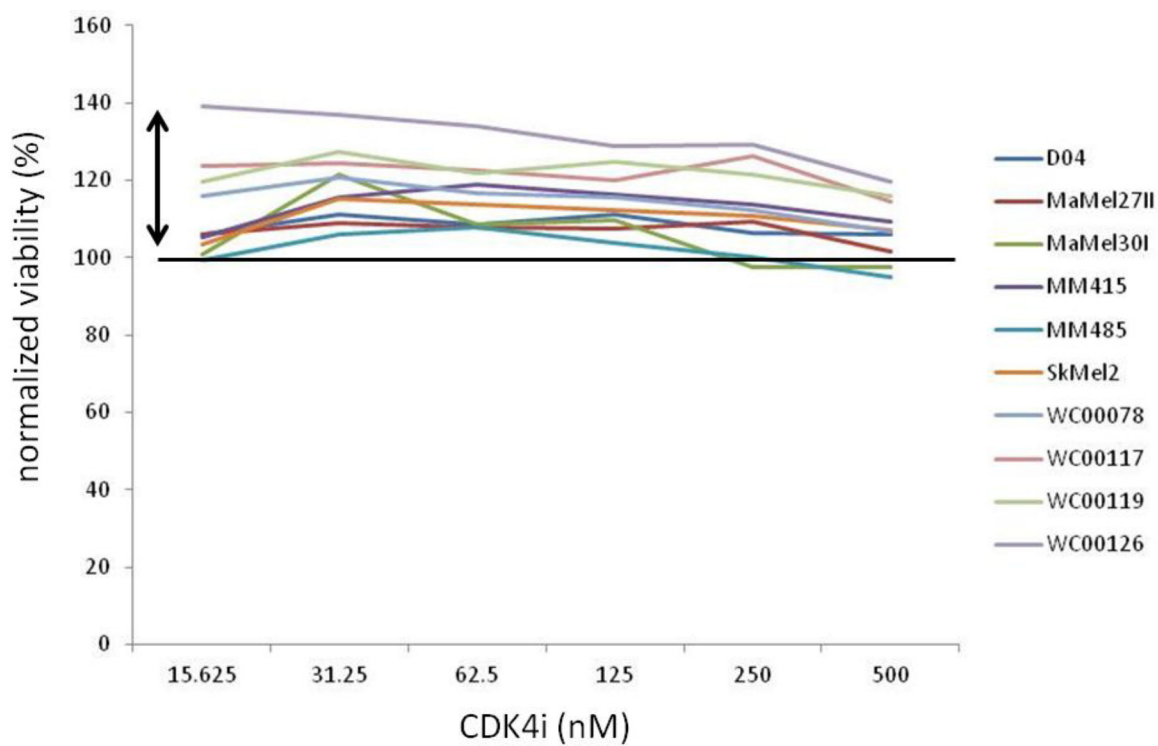

**Supplementary Figure 1: Ten NRAS mutant human melanoma cell lines were incubated with the CDK4/6 inhibitor PD0332991 (palbociclib). No reduction of cell viability was detected with the concentrations used (15.6nM-500nM).**

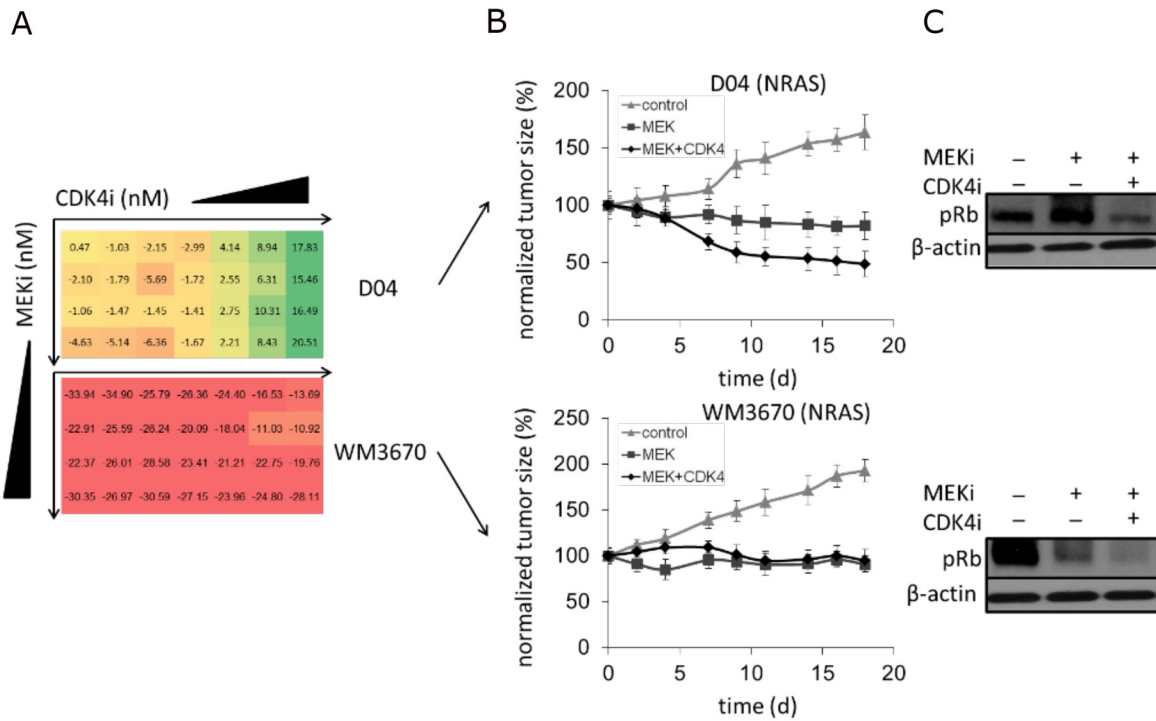

**Supplementary Figure 2:** (A) D04 and WM3670 NRAS mutant melanoma cell lines were incubated with increasing concentrations of a MEK and CDK4 inhibitor (MEKi: 1nM-125nM; CDK4,6i: 0.04nM-625nM). The numbers represent the relative change in viability compared to MEK inhibitor treatment alone. (Color codes: linear range from 'red' - representing less reduction in cell viability by MEK/CDK4,6 compared to single MEK inhibition - to 'green' - representing increased reduction of cell viability by MEK/CDK4,6 compared to single MEK inhibition). (B) Growth curves of D04 and WM3670 NRAS mutant human melanoma xenografts in mice treated with vehicle control, a MEK inhibitor or the MEK/CDK4 inhibitor combination. (C) Respective immunoblots of tumor tissue show an induction of p-Rb in D04 cells and reduction of p-Rb in WM3670 cells after MEK inhibitor treatment. (N=4).

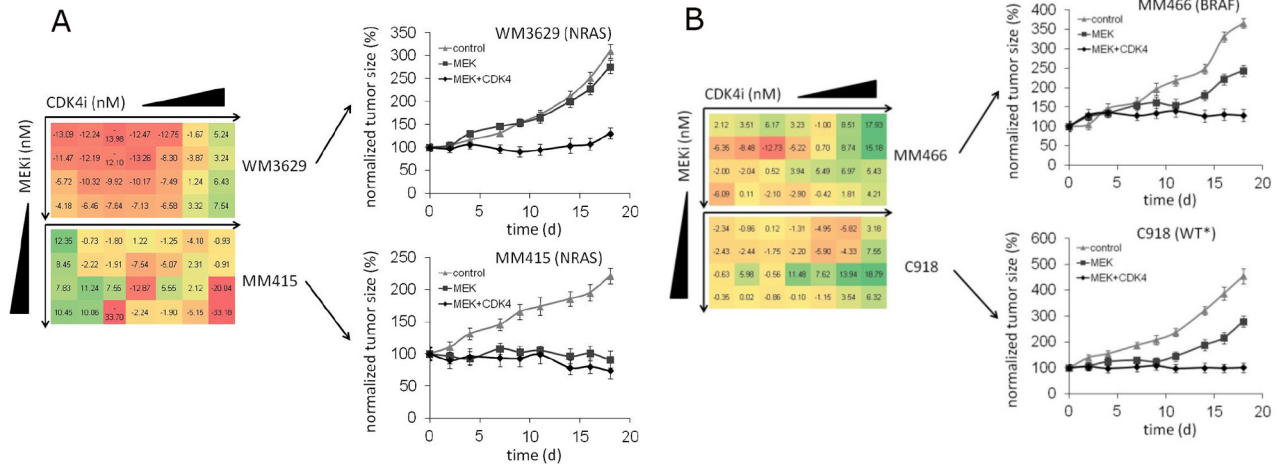

**Supplementary Figure 3:** (A) WM3629 and MM415 NRAS mutant melanoma cell lines were incubated with increasing concentrations of a MEK and CDK4 inhibitor (MEKi: 1nM-125nM; CDK4,6i: 0.04nM-625nM). The numbers represent the relative change in viability compared to MEK inhibitor treatment alone. (Color codes: linear range from 'red' - representing less reduction in cell viability by MEK/CDK4,6 compared to single MEK inhibition - to 'green' - representing increased reduction of cell viability by MEK/CDK4,6 compared to single MEK inhibition). Corresponding growth curves of WM3629 and MM415 xenografted tumors. (N=4). (B) The BRAF(V600E) mutant lines MM466 and the 'wild type' cell lines C918 were incubated with increasing concentrations of a MEK and CDK4 inhibitor. The numbers represent the relative change in viability compared to MEK inhibitor treatment alone. (Color codes: continuous range from 'red' representing antagonism to 'green' representing synergism). Corresponding growth curves of MM466 and C918 xenografted tumors. (N=4).

Supplementary Table 1: Mutation status of cell lines used in this study

| Cell line    | mutation               |
|--------------|------------------------|
| D04          | NRAS(Q61L)             |
| MM415        | NRAS(Q61L)             |
| MM485        | NRAS(Q61R)             |
| WM1366       | NRAS(Q61L)             |
| Sk-Mel-2     | NRAS(Q61K)             |
| WM3060       | NRAS(Q61K)             |
| MaMel27II    | NRAS(G12D)             |
| MaMel30I     | NRAS(G13D) BRAF(D594N) |
| WM3629       | NRAS(G12D) BRAF(D549G) |
| WM3670       | NRAS(G12D) BRAF(G469E) |
| Ma-Mel-144aI | KIT(S476I)             |
| WM3211       | KIT(L576P)             |
| Sk-Mel-28    | BRAF(V600E)            |
| MM466        | BRAF(V600E)            |
| C918         | WT                     |
| Mel202       | GNAQ(Q209L)            |
| OMM1.3       | GNAQ(Q209P)            |

(WT: wild type for BRAF, NRAS, KIT and GNAQ/GNA11 hotspot mutations).

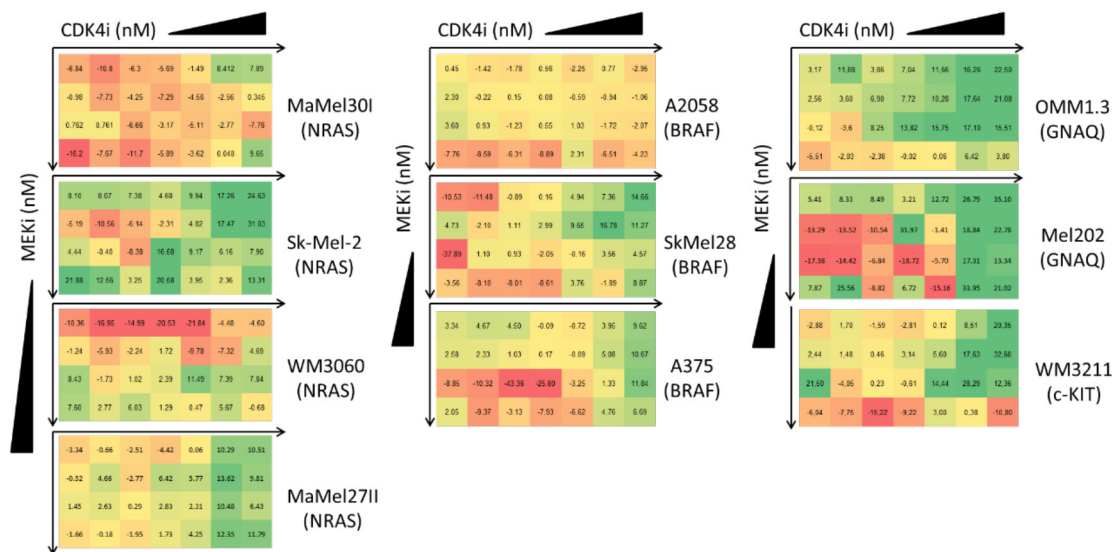

Supplementary Figure 4: *In vitro* growth response results of 4 additional human NRAS mutant melanoma cell lines (MaMel30I, Sk-Mel-2, WM3060, MaMel27II) and the BRAF(V600E) mutant lines A2058, SkMel28 and A375, as well as the GNAQ mutant line Mel202, and OMM1.3 and the c-KIT mutant line WM3211 (MEKi: 1nM-125nM; CDK4,6i: 0.04nM-625nM). The numbers represent the relative change in viability compared to MEK inhibitor treatment alone. (Color codes: linear range from 'red' - representing less reduction in cell viability by MEK/CDK4,6 compared to single MEK inhibition - to 'green' - representing increased reduction of cell viability by MEK/CDK4,6 compared to single MEK inhibition).
